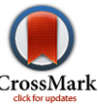

## Correction

# Correction: Interactive Effects of Elevated CO<sub>2</sub> Concentration and Irrigation on Photosynthetic Parameters and Yield of Maize in Northeast China

**The PLOS ONE Staff**

The affiliations of the corresponding author Jiahua Zhang are incorrect. The correct affiliations are: (3) Key Laboratory of Digital Earth Science, Institute of Remote Sensing and Digital Earth, Chinese Academy of Sciences, Beijing, China and (1) Institute of Eco-Environment and Agro-Meteorology, Chinese Academy of Meteorological Sciences, Beijing, China.

**Reference**

1. Meng F, Zhang J, Yao F, Hao C (2014) Interactive Effects of Elevated CO<sub>2</sub> Concentration and Irrigation on Photosynthetic Parameters and Yield of Maize in Northeast China. PLoS ONE 9(5): e98318. doi:10.1371/journal.pone.0098318

**Citation:** The PLOS ONE Staff (2014) Correction: Interactive Effects of Elevated CO<sub>2</sub> Concentration and Irrigation on Photosynthetic Parameters and Yield of Maize in Northeast China. PLoS ONE 9(8): e105898. doi:10.1371/journal.pone.0105898

**Published:** August 14, 2014

**Copyright:** © 2014 The PLOS ONE Staff. This is an open-access article distributed under the terms of the Creative Commons Attribution License, which permits unrestricted use, distribution, and reproduction in any medium, provided the original author and source are credited.
